# Supplementary material
Source: Springer Nature journal article supplement (https://www.springermedizin.de/resource/supplementary/13012_2012_536_MOESM6_ESM.pdf/9630198)
Supplement: MOESM6 [file 9630198]

*Additional file 6: Overview of determinants addressed, study methods, and description of quality assessment in the 41 studies reviewed*

| Study (Year) <sup>no.</sup>   | Strategy<br>Determinants addressed                                                           | Methods<br>Design | Setting (n)                                                                              | Target<br>population               | Unit of analysis(n) <sup>s</sup>                              | Quality assessment<br>Ranking and limitations                                                              |
|-------------------------------|----------------------------------------------------------------------------------------------|-------------------|------------------------------------------------------------------------------------------|------------------------------------|---------------------------------------------------------------|------------------------------------------------------------------------------------------------------------|
| Berg (1995) <sup>33</sup>     | Knowledge, Awareness, Self-efficacy, Action control                                          | UBA               | Medical/surgical ICU (1)                                                                 | NS                                 | HH Opportunities (677)<br>Before (251)<br>After (426)         | 4: Moderate<br>Uncontrolled design, rater procedure not described, test statistics not described           |
| Brock (2002) <sup>34</sup>    | Awareness                                                                                    | RCT               | Study: Emergency care (1)<br>Control: ICU (1)                                            | Nurses<br>Technical staff          | Participants (90)<br>Study (45 nurses)<br>Control (45 nurses) | 5: Moderate<br>Obtrusive observations, rater procedure not described                                       |
| Brown (2003) <sup>35</sup>    | Knowledge, Awareness, Social influence, Self-efficacy, Intention, Action control, Facilities | UBA               | NICU (1)                                                                                 | Nurses<br>Physicians<br>Other HCWs | HH Opportunities (606)<br>Before (283)<br>After (323)         | 4: Moderate<br>Uncontrolled design, sample size described but not justified, rater procedure not described |
| Conly (1989) <sup>36</sup>    | Knowledge, Awareness, Social influence, Attitude, Action control                             | UBA               | Medical ICU (1)                                                                          | Nurses<br>Physicians<br>Other HCWs | HH Opportunities (211)<br>Before (122)<br>After period (99)   | 4: Moderate<br>Uncontrolled design, sample size described but not justified, rater procedure not described |
| Creedon (2006) <sup>37</sup>  | Knowledge, Awareness, Action control, Facilities                                             | UBA               | Medical/surgical ICU (1)                                                                 | Nurses<br>Physicians<br>Other HCWs | HH Opportunities (314)<br>Before (152)<br>After (162)         | 4: Moderate<br>Uncontrolled design, obtrusive observations, rater procedure not described                  |
| Dorsey (1996) <sup>38</sup>   | Knowledge, Action control                                                                    | UBA               | Emergency department (1)                                                                 | Nurses<br>Physicians<br>Other HCWs | HH Opportunities (252)<br>Before (132)<br>After (120)         | 4: Moderate<br>Uncontrolled design, sample size described but not justified/rater procedure not described  |
| Duerink (2006) <sup>39</sup>  | Knowledge, Awareness, Self-efficacy, Action control, Facilities                              | CBA               | Study: Medical internal ward (1)<br>Paediatric ward (1)<br>Control: Gynaecology ward (1) | NS                                 | HH Opportunities (7160)<br>Study (5005)<br>Control (2155)     | 5: Moderate<br>sample size not described, rater procedure not described                                    |
| Earl (2001) <sup>40</sup>     | Facilitation of behaviour                                                                    | UBA               | Medical ICU (1)<br>Surgical ICU (1)                                                      | Nurses<br>Physicians<br>Other HCWs | HH Opportunities (2181)<br>Before (1090)<br>After (1091)      | 4: Moderate<br>Uncontrolled design, sample size described but not justified, rater procedure not described |
| Eldridge (2006) <sup>41</sup> | Knowledge, Awareness, Social influence, Action control, Facilities                           | UBA               | 3 Medical centres<br>ICU (4)                                                             | Nurses<br>Physicians<br>Other HCWs | HH Opportunities (4103)<br>Before (2338)<br>After (1762)      | 4: Moderate<br>Uncontrolled design, obtrusive observations, rater procedure not                            |

|                                   |                                                                              |            |                                                                |                                    |                                                                      |                                                                                                                                           |
|-----------------------------------|------------------------------------------------------------------------------|------------|----------------------------------------------------------------|------------------------------------|----------------------------------------------------------------------|-------------------------------------------------------------------------------------------------------------------------------------------|
| Giannitsioti (2009) <sup>42</sup> | Facilitation of behaviour                                                    | UBA        | Medical ward (1)                                               | Nurses<br>Physicians<br>Other HCWs | HH Opportunities (299)<br>Before (207)<br>After (92)                 | described<br>4: Moderate<br>Uncontrolled design, sample size described but not justified, rater procedure not described                   |
| Golan (2006) <sup>43</sup>        | Action control                                                               | Cross-over | Medical ICU (1)<br>Surgical ICU (1)                            | Nurses<br>Physicians<br>Other HCWs | HH Opportunities (1619)<br>Medical ICU (998)<br>Surgical ICU (621)   | 6: high<br>rater procedure not described                                                                                                  |
| Gould (1997) <sup>44</sup>        | Knowledge, Awareness, Attitude, Self-efficacy, Facilities                    | CBA        | Study:<br>Surgical wards (2)<br>Control:<br>Surgical wards (2) | Nurses                             | Participants<br>Study (16)<br>Control (15)                           | 4: Moderate<br>Sample size described but not justified, obtrusive observations, rater procedure not described                             |
| Haas (2008) <sup>45</sup>         | Facilitation of behaviour                                                    | UBA        | Emergency department (1)                                       | Nurses<br>Physicians<br>Other HCWs | HH Opportunities (757)<br>Before NS<br>After NS                      | 4: Moderate<br>Uncontrolled design, obtrusive observations, rater procedure not described                                                 |
| Harbarth (2002) <sup>46</sup>     | Knowledge, Awareness, Social influence, Attitude, Action control, Facilities | UBA        | General PICU (1),<br>Cardiac ICU (1),<br>NICU (1)              | Nurses<br>Physicians<br>Other HCWs | HH Opportunities (12,216)                                            | 5: Moderate<br>Uncontrolled design, sample size described but not justified                                                               |
| Howard (2009) <sup>47</sup>       | Knowledge, Awareness, Action control                                         | UBA        | Surgical ward (4)<br>Emergency department (1)                  | Nurses<br>Physicians<br>Other HCWs | Patients<br>Before (85 patients)<br>After (74 patients)              | 4: Moderate<br>Uncontrolled design, sample size described but not justified, rater procedure not described                                |
| Huang (2002) <sup>48</sup>        | Knowledge, Awareness, Self-efficacy                                          | RCT        | All hospital departments                                       | Nurses                             | Participants (98)<br>Study (49 nurses)<br>Control (49 nurses)        | 4: Moderate<br>Sample size described but not justified, obtrusive observations, rater procedure not described                             |
| Khatib (1999) <sup>49</sup>       | Action control                                                               | UBA        | ICU (1)                                                        | NS                                 | HH Opportunities (1080)<br>Before (537)<br>After (543)               | 3: Moderate<br>Uncontrolled design, sample size described but not justified, rater procedure not described, test statistics not described |
| Lam (2004) <sup>50</sup>          | Knowledge, Attitude, Self-efficacy, Action control, Facilities               | UBA        | NICU (1)                                                       | Nurses<br>Physicians<br>Other HCWs | HH Opportunities (983)<br>Before (666)<br>After (317)                | 4: Moderate<br>Uncontrolled design, sample size described but not justified, rater procedure not described                                |
| Larson (1991) <sup>51</sup>       | Knowledge, Facilities                                                        | UBA        | NICU* (1)<br>Recovery unit (1)                                 | Nurses<br>Physicians<br>Other HCWs | HH Opportunities (1610)<br>Automatic sink (615)<br>Manual sink (995) | 4: Moderate<br>Uncontrolled design, sample size described but not justified, obtrusive                                                    |

|                                     |                                                                                            |            |                                                                                            |                                    |                                                                                       |                                                                                                                                |
|-------------------------------------|--------------------------------------------------------------------------------------------|------------|--------------------------------------------------------------------------------------------|------------------------------------|---------------------------------------------------------------------------------------|--------------------------------------------------------------------------------------------------------------------------------|
| Larson (1997) <sup>52</sup>         | Knowledge, Awareness, Social influence, Facilities                                         | CBA        | Study: Neurosurgical ICU (1)<br>Control: Surgical ICU (1)                                  | Nurses                             | HH Opportunities (1983) Study (991) Control (992)                                     | observations but rater procedure described<br>6: High<br>Sample size described but not justified                               |
| Larson (2000) <sup>53</sup>         | Knowledge, Awareness, Social influence, Attitude, Self-efficacy, Intention, Action control | CBA        | Study: 1 hospital Medical ICU (1) NICU (1)<br>Control: 1 hospital Medical ICU (1) NICU (1) | NS                                 | Number of dispenser activations (860,567) Study (477,680) Control (382,887)           | 4: Moderate<br>Sample size described but not justified, adherence measured by used volume of soap or hand alcohol              |
| Larson (2005) <sup>54</sup>         | Facilitation of behaviour                                                                  | Cross-over | Paediatric emergency department (1) PICU (1)                                               | NS                                 | HH Opportunities (5568)                                                               | 6: High<br>Obtrusive observations but rater procedure described                                                                |
| Marra (2008) <sup>55</sup>          | Awareness, Social influence, Self-efficacy, Intention                                      | CBA        | Study: step-down unit (1)<br>Control: step-down unit (1)                                   | HCWs (NS)                          | HH episodes by electronic counting device (228,297) study (117,579) Control (110,718) | 4: Moderate<br>Sample size described but not justified, adherence measured by electronic counting device                       |
| Mayer (1986) <sup>56</sup>          | Knowledge, Awareness, Facilities                                                           | CBA        | Study: ICU (1)<br>Control: ICU (1)                                                         | Nurses                             | HH opportunities (834) Study (610) Control (224)                                      | 6: High<br>Sample size described but not justified                                                                             |
| Moongtui (2000) <sup>57</sup>       | Awareness, Social influence                                                                | RCT        | Emergency department (1)<br>Randomisation of nurses                                        | Nurses<br>Other HCWs               | Participants (91) Study (36) Control (55)                                             | 6: High<br>Rater procedure not described                                                                                       |
| Muto (2000) <sup>58</sup>           | Knowledge, Self-efficacy, Action control, Facilities                                       | UBA        | Medical ward (1)<br>Medical ICU (1)                                                        | Nurses<br>Physicians<br>Other HCWs | HH Opportunities (239) Before (126) After (113)                                       | 3: Moderate<br>Uncontrolled design, rater procedure not described, test statistics not described                               |
| Picheansathian (2008) <sup>59</sup> | Knowledge, Awareness, Action control, Facilities                                           | UBA        | PICU (1)                                                                                   | Nurses                             | HH Opportunities (1245) Before (320) After (925)                                      | 4: Moderate<br>Uncontrolled design, sample size described but not justified, obtrusive observations, rater procedure described |
| Pittet (2000) <sup>1</sup>          | Knowledge, Awareness, Social influence, Action control, Facilities                         | UBA        | All hospital wards                                                                         | Nurses<br>Physicians<br>Other HCWs | HH Opportunities (5403) Before (2834) After (2569)                                    | 5: Moderate<br>Uncontrolled design, sample size described but not justified                                                    |
| Raju (1991) <sup>60</sup>           | Knowledge, Awareness, Attitude                                                             | UBA        | NICU (1)                                                                                   | Nurses<br>Physicians               | HH Opportunities (412) Before (257)                                                   | 4: Moderate<br>Uncontrolled design, sample size                                                                                |

|                              |                                                                  |            |                                                                                                                                                                                       |                                                                                        |                                                                      |                                                                                                                                                                          |
|------------------------------|------------------------------------------------------------------|------------|---------------------------------------------------------------------------------------------------------------------------------------------------------------------------------------|----------------------------------------------------------------------------------------|----------------------------------------------------------------------|--------------------------------------------------------------------------------------------------------------------------------------------------------------------------|
| Raskind (2007) <sup>61</sup> | Knowledge, Intention, Action control                             | UBA        | PICU (1)                                                                                                                                                                              | Nurses<br>Physicians<br>Other HCWs<br>Administrative personnel,<br>Family and visitors | After (155)<br>HH Opportunities (401)<br>Before (189)<br>After (212) | described but not justified, rater procedure not described<br>4: Moderate<br>Uncontrolled design, sample size described but not justified, rater procedure not described |
| Rupp (2007) <sup>62</sup>    | Knowledge, Action control, Facilities                            | Cross-over | ICU A/B                                                                                                                                                                               | Nurses<br>physicians<br>other HCWs                                                     | HH Opportunities (3678)                                              | 5: Moderate<br>Sample size described but not justified, rater procedure not described                                                                                    |
| Santana (2007) <sup>63</sup> | Knowledge, Action control, Facilities                            | UBA        | ICU (1)                                                                                                                                                                               | Nurses<br>Physicians<br>Other HCWs                                                     | HH Opportunities (3476)<br>Before (2032)<br>After (1444)             | 4: Moderate<br>Uncontrolled design, sample size described but not justified, rater procedure not described                                                               |
| Sharek (2002) <sup>64</sup>  | Knowledge, Awareness, Action control                             | UBA        | NICU (1)                                                                                                                                                                              | Nurses<br>Physicians<br>Other HCWs                                                     | Participants (46)                                                    | 4: Moderate<br>Uncontrolled design, sample size described but not justified, rater procedure not described                                                               |
| Simmons (1990) <sup>65</sup> | Knowledge, Awareness, Social influence, Attitude, Action control | UBA        | Surgical ICU (1)<br>Medical ICU (1)                                                                                                                                                   | Nurses<br>Physicians<br>Other HCWs                                                     | HH Opportunities (485)<br>Before (257)<br>After (155)                | 4: Moderate<br>Uncontrolled design, sample size described but not justified, rater procedure not described                                                               |
| Slota (2001) <sup>66</sup>   | Knowledge, Action control                                        | UBA        | PICU (1)                                                                                                                                                                              | NS                                                                                     | HH Opportunities (350)<br>Before and after<br>numbers NS             | 4: Moderate<br>Uncontrolled design, sample size described but not justified, rater procedure not described                                                               |
| Trick (2006) <sup>67</sup>   | Knowledge, Awareness, Attitude, Action control, Facilities       | CBA        | Multicentre (4)<br>study: 3 hospitals<br>Medical ward (2)<br>Surgical ward (1)<br>ICU/PICU (5)<br>Skilled care (1)<br>Control: 3 hospitals<br>ICU/PICU (2)<br>Rehabilitation ward (1) | Nurses<br>Physicians<br>Other HCWs                                                     | HH Opportunities (6948)<br>Study (5206)<br>Control (1742)            | 6: High<br>Sample size described but not justified                                                                                                                       |
| v/d Mortel                   | Awareness, Action control                                        | UBA        | NICU (1)                                                                                                                                                                              | Nurses                                                                                 | HH Opportunities (893)                                               | 4: Moderate                                                                                                                                                              |

|                                 |                                                                                             |     |                                                                                        |                                    |                                                                        |                                                                                                            |
|---------------------------------|---------------------------------------------------------------------------------------------|-----|----------------------------------------------------------------------------------------|------------------------------------|------------------------------------------------------------------------|------------------------------------------------------------------------------------------------------------|
| (1995) <sup>68</sup>            |                                                                                             |     | High care (1)                                                                          | Physicians<br>Other HCWs           | Before (303)<br>After (590)                                            | Uncontrolled design, sample size described but not justified, rater procedure not described                |
| v/d Mortel (2000) <sup>69</sup> | Awareness                                                                                   | UBA | ICU (1)<br>High care (1)                                                               | Nurses<br>Physicians<br>Other HCWs | HH Opportunities (542)<br>Before (143)<br>After (399)                  | 4: Moderate<br>Uncontrolled design, sample size described but not justified, rater procedure not described |
| Whitby (2004) <sup>70</sup>     | Facilitation of behaviour                                                                   | UBA | Internal medical ward (1)<br>PICU (1) Infectious diseases ward (1)<br>Urology ward (1) | Nurses                             | HH Opportunities (8146)<br>Before (4001)<br>After (4145)               | 4: Moderate<br>Uncontrolled design, sample size described but not justified, rater procedure not described |
| Won (2004) <sup>71</sup>        | Knowledge, Awareness, Attitude, Action control, Facilities                                  | UBA | NICU (1)                                                                               | Nurses<br>Physicians<br>Other HCWs | HH Opportunities NS (312 observation periods)<br>Before NS<br>After NS | 4: Moderate<br>Uncontrolled design, sample size not described, rater procedure not described               |
| Zerr (2005) <sup>72</sup>       | Knowledge, Awareness, Social influence, Attitude, Self-efficacy, Action control, Facilities | UBA | Paediatric ward (1)<br>Surgical ward (1)                                               | Nurses<br>Physicians<br>Other HCWs | HH Opportunities (1526)<br>Before (958)<br>After (568)                 | 4: Moderate<br>Uncontrolled design, sample size described but not justified, rater procedure not described |

CBA = Controlled before-and-after study, HH = hand hygiene, HCWs = healthcare workers, ICU = intensive care unit, NICU = neonatal intensive care unit, NS = , PICU = paediatric intensive care unit, UBA = uncontrolled before-and-after study,

<sup>§</sup>Numbers are calculated from baseline data and data derived directly
